# Supplementary material
Source: publisher figshare collection journal article supplement (https://acs.figshare.com/ndownloader/files/12244562)
Supplement: Supplementary file 1 [file 12244562]

## **Bioaccumulation of Polycyclic Aromatic Hydrocarbons (PAHs) by the Marine Clam, *Macra veneriformis*, Chronically Exposed to Oil-Suspended Particulate Matter Aggregates**

Junsung Noh, Hosang Kim, Changkeun Lee, Seo Joon Yoon, Seungoh Chu, Bong-Oh Kwon, Jongseong Ryu, Jae-Jin Kim, Hanbyul Lee, Un Hyuk Yim, John P. Giesy and Jong Seong Khim\*

\* Corresponding author

### **Contents of Supporting Information**

#### **Supporting Materials and Methods**

|                                       |    |
|---------------------------------------|----|
| <b>Stable Isotope Analysis.</b> ..... | S2 |
|---------------------------------------|----|

#### **Supporting Results**

|                                                             |    |
|-------------------------------------------------------------|----|
| <b>Comparison of Stable Isotopic Ratios in Clams.</b> ..... | S2 |
|-------------------------------------------------------------|----|

#### **Supporting Tables**

|                                                                                         |     |
|-----------------------------------------------------------------------------------------|-----|
| <b>Table S1.</b> Mini-review of bioaccumulation of PAHs in marine organisms... ..       | S3  |
| <b>Table S2.</b> Baseline information of sediment properties ... ..                     | S4  |
| <b>Table S3.</b> Experimental conditions of preparation of the OSAs .....               | S5  |
| <b>Table S4.</b> List of target PAH compounds measured by ... ..                        | S6  |
| <b>Table S5.</b> GC/MSD conditions for the analyses of PAHs and alkylated PAHs .....    | S7  |
| <b>Table S6.</b> Mean concentrations of PAHs (ng/g, wm) in soft tissue of clams ... ..  | S8  |
| <b>Table S7.</b> Result of Mann-Whitney U-test for comparison of ... ..                 | S9  |
| <b>Table S8.</b> Spearman rank correlation results for concentrations of 20 PAHs ... .. | S10 |
| <b>Table S9.</b> Result of Kolmogorov-Smirnov normality test for concentrations ... ..  | S11 |

#### **Supporting Figures**

|                                                                                                     |     |
|-----------------------------------------------------------------------------------------------------|-----|
| <b>Figure S1.</b> Total PAHs concentration in sediment ... ..                                       | S12 |
| <b>Figure S2.</b> PAHs and alkylated PAHs in OSAs ... ..                                            | S13 |
| <b>Figure S3.</b> Concentrations of 25 PAHs in soft tissue of clams ... ..                          | S14 |
| <b>Figure S4.</b> PAHs compounds in soft tissue of clams ... ..                                     | S15 |
| <b>Figure S5.</b> Relative compositions of PAHs and alkylated PAHs ... ..                           | S16 |
| <b>Figure S6.</b> Stable isotopic ratios of carbon and nitrogen in clams OSAs, sediment, and ... .. | S17 |
| <b>Figure S7.</b> Relationship between Log $K_{ow}$ and concentration of PAHs ... ..                | S18 |

|                         |     |
|-------------------------|-----|
| <b>References</b> ..... | S19 |
|-------------------------|-----|

## Supporting Materials and Methods

**Stable Isotope Analysis.** Only soft tissues were analyzed for stable isotope ratios of carbon ( $\delta^{13}\text{C}$ ) and nitrogen ( $\delta^{15}\text{N}$ ). Soft tissues were rinsed with distilled water, homogenized, and stored frozen at  $-20\text{ }^{\circ}\text{C}$  until analysis. Subsamples of OSAs were sieved through a glass-fiber filter and then stored at  $-20\text{ }^{\circ}\text{C}$  until isotopes were analyzed. To determine stable isotopic ratios of clams after feeding OSAs, a method slightly modified from that described previously was used<sup>1</sup>, wherein soft tissues sampled at Days 1, 2, 7, 14, 30, and 50 were lyophilized and then lipids were removed. The analysis consisted of first adding approximately 10 mL of dichloromethane (DCM)/methanol (2:1, v/v) to 10-20 mg of freeze-dried soft tissue. The mixture was then sonicated for 10 min and centrifuged at 4000 g for 15 min. Then organic solvents were pipetted off and discarded. This extraction procedure was repeated three times. Then, lipid-free tissues were evaporated under a gentle stream of  $\text{N}_2$  at room temperature until dry. Before quantifications of isotopes in OSAs, samples were freeze-dried and de-carbonated overnight by fuming with  $\text{HCl}$  in a desiccator<sup>2,3</sup>.

$\delta^{13}\text{C}$  and  $\delta^{15}\text{N}$  were measured with an Elemental Analyzer (EA)-Isotope Ratio Mass Spectrometer (IRMS) (Elementar, Hanau, Hesse). High purity  $\text{CO}_2$  and  $\text{N}_2$  were used as reference gases, while  $\text{He}$  and  $\text{O}_2$  were used as the carrier and combustion gases, respectively. Stable carbon and nitrogen isotopic ratios were expressed as ‰ delta notation (Equations 1 and 2)

$$\delta^{13}\text{C} (\text{‰}) = [\text{R}_{\text{sam}}/\text{R}_{\text{ref}} - 1] \times 1000 \quad (1)$$

$$\delta^{15}\text{N} (\text{‰}) = [\text{R}_{\text{sam}}/\text{R}_{\text{ref}} - 1] \times 1000 \quad (2)$$

where:  $\text{R}_{\text{sam}}$  and  $\text{R}_{\text{ref}}$  are the ratios ( $^{13}\text{C}/^{12}\text{C}$  or  $^{15}\text{N}/^{14}\text{N}$ ) of the sample and reference, respectively. Isotopic ratios were reported relative to the Vienna Pee Dee Belemnite (VPDB) standard. International isotope standards, IAEA-CH-3 and IAEA-N-2 to calibrate  $\delta^{13}\text{C}$  and  $\delta^{15}\text{N}$ , were used.

## Supporting Results

**Comparison of Stable Isotopic Ratios in Clams.** Based on carbon and nitrogen stable isotope ratios, determined for clams in our experiment and the typical fractionation pattern for a single trophic step (from food source to consumer), isotopic values for *Macraa veneriformis* averaged  $-17.2\text{‰}$  for  $\delta^{13}\text{C}$  and  $12.2\text{‰}$  for  $\delta^{15}\text{N}$  (SI-Figure S6). Stable isotopic ratios were lighter than values previously determined for soft clams, averaging  $-26.8$ ,  $-20.8$ , and  $-26.9\text{‰}$  for  $\delta^{13}\text{C}$  and  $9.7$ ,  $8.4$ , and  $7.3\text{‰}$ , for OSAs, sediment, and crude oil, respectively. By Day 50 the mean difference in stable isotope ratios varied little relative to ratios obtained on Day 1:  $0.9 \pm 0.1\text{‰}$  for carbon and  $0.3 \pm 0.2\text{‰}$  for nitrogen (SI-Figure S6).

**Table S1.** Mini-review of bioaccumulation of PAHs in marine organisms (fish and bivalves), data from in situ measurements.

| Species                          | Region                          | Dominating Mol. Mass | ΣPAHs (ng/g)    | Reference                               |
|----------------------------------|---------------------------------|----------------------|-----------------|-----------------------------------------|
| <b>Fish</b>                      |                                 |                      |                 |                                         |
| <i>Clupea pallasii</i>           | Puget Sound, Washington, USA    | LMM <sup>a</sup>     | 1.1 – 140       | West et al., 2014 <sup>4</sup>          |
| <i>Mullus barbatus</i>           | Mediterranean Sea               | LMM                  | 14.7 – 49.6     | Baumard et al., 1998 <sup>5</sup>       |
| <i>Serranus scriba</i>           | Mediterranean Sea               | LMM                  | 23.6 – 139      |                                         |
| <i>Micropogonias furnieri</i>    | Bahía Blanca Estuary, Argentina | LMM                  | 34.87           | Oliva et al., 2017 <sup>6</sup>         |
| <i>Cynoscion guatucupa</i>       | Bahía Blanca Estuary, Argentina | LMM                  | 98.25           |                                         |
| <i>Anguilla anguilla</i>         | Biertze Lagoon, Tunisia         | LMM                  | 114.5 – 133.7   | Barhoumi et al., 2016 <sup>7</sup>      |
| <i>Scophthalmus maximus</i>      | Laboratory                      | LMM                  | 121             | Baussant et al., 2001 <sup>8</sup>      |
| <i>Cynoglossus senegalensis</i>  | Gulf of Guinea, Ghana           | LMM                  | 67 – 163        | Bandowe et al., 2014 <sup>9</sup>       |
| <i>Drepane africana</i>          | Gulf of Guinea, Ghana           | LMM                  | 136 – 453       |                                         |
| <i>Pomadasys perotai</i>         | Gulf of Guinea, Ghana           | LMM                  | 163 – 252       |                                         |
| <i>Sarotherodon mossambicus</i>  | Pearl River Estuary, Hong Kong  | LMM                  | 184 – 194       | Liang et al., 2007 <sup>10</sup>        |
| <i>Ramnogaster arcuata</i>       | Bahía Blanca Estuary, Argentina | LMM                  | 182.35          | Oliva et al., 2017 <sup>6</sup>         |
| <i>Mustelus schmitti</i>         | Bahía Blanca Estuary, Argentina | LMM                  | 308.96          |                                         |
| <i>Anguilla anguilla</i>         | Amsterdam, Netherlands          | LMM                  | 11,000 – 39,000 | van der Oost et al., 1994 <sup>11</sup> |
| <b>Bivalves</b>                  |                                 |                      |                 |                                         |
| <i>Chlamys farreri</i>           | Yellow Sea, China               | NA <sup>c</sup>      | ND <sup>d</sup> | Liu et al., 2008 <sup>12</sup>          |
| <i>Cyclina sinensis</i>          | Yellow Sea, China               | NA                   | ND              |                                         |
| <i>Neptunea arthritica</i>       | Yellow Sea, China               | NA                   | ND              |                                         |
| <i>Neverita didyma</i>           | Yellow Sea, China               | NA                   | ND              |                                         |
| <i>Anadara kagoshimensis</i>     | Yellow Sea, China               | NA                   | ND              |                                         |
| <i>Siliqua pulchella</i>         | Yellow Sea, China               | NA                   | ND              |                                         |
| <i>Bullacta exarata</i>          | Yellow Sea, China               | HMM <sup>b</sup>     | 23.5            |                                         |
| <i>Euspira gilva</i>             | Yellow Sea, China               | HMM                  | 23.5            |                                         |
| <i>Solen grandis</i>             | Yellow Sea, China               | HMM                  | 23.5            |                                         |
| <i>Mytilus edulis</i>            | Yellow Sea, China               | HMM                  | ND – 29.3       |                                         |
| <i>Saccostrea cucullata</i>      | Yellow Sea, China               | HMM                  | 29.7            |                                         |
| <i>Magallana gigas</i>           | Yellow Sea, China               | HMM                  | 24.7 – 30.3     |                                         |
|                                  | Pacific Coast, Japan            | LMM                  | 370             | Onozato et al., 2016 <sup>13</sup>      |
| <i>Leukoma jedomensis</i>        | Yellow Sea, China               | HMM                  | 26.5 – 39.7     | Liu et al., 2008 <sup>12</sup>          |
| <i>Anadara broughtonii</i>       | Yellow Sea, China               | HMM                  | 41.9            |                                         |
| <i>Mytilus galloprovincialis</i> | Gironde Estuary France          | LMM, HMM             | 49.8 – 101.5    | Bodin et al., 2004 <sup>14</sup>        |
|                                  | Pacific Coast, Japan            | LMM                  | 301             | Onozato et al., 2016 <sup>13</sup>      |
|                                  | Arachon Bay, France             | HMM                  | 279 – 2420      | Baumard et al., 1998 <sup>5</sup>       |
| <i>Meretrix meretrix</i>         | Yellow Sea, China               | LMM                  | 28.3 – 108.0    | Liu et al., 2008 <sup>12</sup>          |
| <i>Ruditapes philippinarum</i>   | Pacific Coast, Japan            | LMM                  | 244             | Onozato et al., 2016 <sup>13</sup>      |
|                                  | Yellow Sea, China               | HMM                  | 24.8 – 302.0    | Liu et al., 2008 <sup>12</sup>          |
| <i>Brachidontes rodriguezi</i>   | Bahía Blanca Estuary, Argentina | LMM                  | ND – 482.4      | Oliva et al., 2017 <sup>6</sup>         |
| <i>Mytilus galloprovincialis</i> | Mediterranean Sea               | LMM                  | 25.1 – 337      | Baumard et al., 2001 <sup>5</sup>       |
|                                  | Biertze Lagoon, Tunisia         | LMM                  | 107.4 – 430.7   | Barhoumi et al., 2016 <sup>7</sup>      |
|                                  | Urdaibai Estuary, Spain         | HMM                  | 21 – 64         | Orbea et al., 2002 <sup>15</sup>        |
| <i>Magallana sp.</i>             | Urdaibai Estuary, Spain         | HMM                  | 31 – 218        |                                         |
| <i>Mya truncata</i>              | Svalbard Fjord                  | LMM                  | 200,080*        | Camus et al., 2003 <sup>16</sup>        |

\*Analyzed in lipid extracts from *Mya truncata*.

a = “Lower Molecular Mass”, b = “Higher Molecular Mass”, c = “Not Available”, and d = “Not Detected”.

**Table S2.** Baseline information of sediment properties. Sandy loam was used for bottom sediment in experimental tank.

| Experimental treatment | Organic contents* (%) | Mud contents (%) | Grain size | Sediment source                  |
|------------------------|-----------------------|------------------|------------|----------------------------------|
| Control                | 0.92 ± 0.08           | 0.79 ± 0.25      | <1 mm      | Samhangang INC.,<br>Incheon, KOR |
| OSA <sub>low</sub>     | 0.98 ± 0.20           |                  |            |                                  |
| OSA <sub>high</sub>    | 0.81 ± 0.08           |                  |            |                                  |

\*Mean during the whole treatment period (Day 1, 2, 4, 7, 14, 30, 40, and 50)

**Table S3.** Experimental conditions of preparation of the OSAs.

| <i>Preparation of OSAs</i>                                                                                                                                                                                                                                    |                                                            |
|---------------------------------------------------------------------------------------------------------------------------------------------------------------------------------------------------------------------------------------------------------------|------------------------------------------------------------|
| <div style="display: flex; justify-content: space-around; align-items: flex-start;"> <div style="text-align: center;"> <p><b>Schematic drawing</b></p> </div> <div style="text-align: center;"> <p><b>OSAs + Seawater mixture in carboy</b></p> </div> </div> |                                                            |
| <b>Reaction chamber</b>                                                                                                                                                                                                                                       | SCHOTT-DURAN 20 Lit. Glass Aspiration Carboy (①)           |
| Volume                                                                                                                                                                                                                                                        | 2000 mL                                                    |
| Headspace                                                                                                                                                                                                                                                     | >10% by volume (②)                                         |
| <b>Water column</b>                                                                                                                                                                                                                                           | GF/F-filtered seawater (③)                                 |
| Volume                                                                                                                                                                                                                                                        | 1000 mL (1000 g)                                           |
| Salinity                                                                                                                                                                                                                                                      | 34 psu                                                     |
| <b>Oil</b>                                                                                                                                                                                                                                                    | Iranian heavy crude oil (④)                                |
| Concentration                                                                                                                                                                                                                                                 | 0.6 g/L                                                    |
| <b>Sediment</b>                                                                                                                                                                                                                                               | Dried, from a mudflat (④)                                  |
| Concentration                                                                                                                                                                                                                                                 | 0.2 g/L                                                    |
| Size                                                                                                                                                                                                                                                          | $\Phi < 20 \mu\text{m}$                                    |
| Total organic matter contents                                                                                                                                                                                                                                 | ~6%                                                        |
| <b>Reciprocating shaker</b>                                                                                                                                                                                                                                   | EYELA Shaker NTS-4000A                                     |
| Shaking speed                                                                                                                                                                                                                                                 | 170 rpm (⑤)                                                |
| Shaking duration                                                                                                                                                                                                                                              | 24 h (⑥)                                                   |
| Shaking condition                                                                                                                                                                                                                                             | Sealed vessel in dark room at test temperature (15 °C) (⑦) |
| <b>Subsampling of OSAs</b>                                                                                                                                                                                                                                    | (only used for neutral and negative buoyancy)              |
| Settling                                                                                                                                                                                                                                                      | 5 min                                                      |
| Extraction (in carboy)                                                                                                                                                                                                                                        | 700 mL (OSAs + seawater mixture) (⑧)                       |

This method was slightly modified from Sun et al., 2010<sup>17</sup>.

**Table S4.** List of target PAHs compounds measured by gas chromatograph equipped with a mass selective detector (GC/MSD) in OSAs experiment; Full chemical name, acronym, molecular mass grouping, carbon ring number, and Log K<sub>ow</sub> values with references given.

| Full chemical name              | Acronym | MMG* | Ring number | Log K <sub>ow</sub> **                                    |
|---------------------------------|---------|------|-------------|-----------------------------------------------------------|
| Naphthalene                     | Nap     | LMM  | 2           | 3.33 <sup>b</sup> , 3.35 <sup>a</sup>                     |
| Acenaphthylene                  | AcI     | LMM  | 3           | 3.67 <sup>a</sup> , 4.2 <sup>b</sup>                      |
| Acenaphthene                    | Ace     | LMM  | 3           | 3.92 <sup>a</sup> , 4.0 <sup>b</sup>                      |
| Fluorene                        | Flu     | LMM  | 3           | 4.18 <sup>a</sup> , 4.32 <sup>b</sup>                     |
| Dibenzothiophene                | Dbt     | LMM  | 3           | 4.38 <sup>a</sup> , 4.52 <sup>c</sup>                     |
| Phenanthrene                    | Phe     | LMM  | 3           | 4.52 <sup>b</sup> , 4.57 <sup>a</sup> , 4.90 <sup>c</sup> |
| Anthracene                      | Ant     | LMM  | 3           | 4.50 <sup>b</sup> , 4.68 <sup>a</sup>                     |
| 1-Methylnaphthalene             | C1-Nap  | LMM  | 2           | 3.89 <sup>d</sup>                                         |
| 2-Methylnaphthalene             | C2-Nap  | LMM  | 2           | 3.88 <sup>a</sup> , 3.96 <sup>d</sup>                     |
| 1,4,5-Trimethylnaphthalene      | C3-Nap  | LMM  | 2           | 4.48 <sup>d</sup>                                         |
| 1,2,5,6-Tetramethylnaphthalene  | C4-Nap  | LMM  | 2           | 4.95 <sup>d</sup> , 5.53 <sup>a</sup>                     |
| 9-Methylfluorene                | C1-Flu  | LMM  | 3           | 4.66 <sup>c</sup>                                         |
| 1,7-Dimethylfluorene            | C2-Flu  | LMM  | 3           | 5.08 <sup>c</sup>                                         |
| 9-n-Propylfluorene              | C3-Flu  | LMM  | 3           | 5.85 <sup>a</sup>                                         |
| 2-Methyldibenzothiophene        | C1-Dbt  | LMM  | 3           | 4.93 <sup>a</sup> , 5.04 <sup>c</sup>                     |
| 2,4-Dimethyldibenzothiophene    | C2-Dbt  | LMM  | 3           | 5.47 <sup>c</sup>                                         |
| 2,4,7-Trimethyldibenzothiophene | C3-Dbt  | LMM  | 3           | 6.03 <sup>a, c</sup>                                      |
| 3-Methylphenanthrene            | C1-Phe  | LMM  | 3           | 5.34 <sup>c</sup>                                         |
| 1,6-Dimethylphenanthrene        | C2-Phe  | LMM  | 3           | 5.64 <sup>c</sup>                                         |
| 1,2,9-Trimethylphenanthrene     | C3-Phe  | LMM  | 3           | 6.03 <sup>c</sup>                                         |
| 1,2,6,9-Tetramethylphenanthrene | C4-Phe  | LMM  | 3           | 6.48 <sup>c</sup>                                         |
| Fluoranthene                    | Fl      | HMM  | 4           | 5.20 <sup>b</sup> , 5.23 <sup>a</sup>                     |
| Pyrene                          | Py      | HMM  | 4           | 5.00 <sup>b</sup> , 5.13 <sup>a</sup>                     |
| Benzo[ <i>a</i> ]anthracene     | BaA     | HMM  | 4           | 5.91 <sup>a, b</sup>                                      |
| Chrysene                        | Chr     | HMM  | 4           | 5.81 <sup>a</sup> , 5.86 <sup>b</sup>                     |
| Benzo[ <i>b</i> ]fluoranthene   | BbF     | HMM  | 5           | 5.78 <sup>a</sup> , 5.8 <sup>b</sup>                      |
| Benzo[ <i>k</i> ]fluoranthene   | BkF     | HMM  | 5           | 6.11 <sup>b</sup>                                         |
| Benzo[ <i>a</i> ]pyrene         | BaP     | HMM  | 5           | 6.13 <sup>a</sup> , 6.35 <sup>b</sup>                     |
| Perylene                        | Pery    | HMM  | 5           | 6.25 <sup>a</sup>                                         |
| Indeno[1,2,3- <i>cd</i> ]pyrene | IcdP    | HMM  | 6           | 6.58 <sup>a</sup> , 6.72 <sup>b</sup>                     |
| Dibenzo[ <i>a,h</i> ]anthracene | DbahA   | HMM  | 5           | 6.75 <sup>a, b</sup>                                      |
| Benzo[ <i>g,h,i</i> ]perylene   | BghiP   | HMM  | 6           | 6.5 <sup>a</sup> , 6.9 <sup>b</sup>                       |
| 3-Methylchrysene                | C1-Chr  | HMM  | 4           | 6.42 <sup>c</sup>                                         |
| 6-Ethylchrysene                 | C2-Chr  | HMM  | 4           | 6.88 <sup>c</sup>                                         |
| 1,3,6-Trimethylchrysene         | C3-Chr  | HMM  | 4           | 7.44 <sup>c</sup>                                         |

\*Molecular mass groups (MMGs) were categorized based on ring number class as either lower molecular mass (LMM, 2-3 rings) or higher molecular mass (HMM, 3-4 rings).

\*\*Data for Log K<sub>ow</sub> values obtained from studies by: (a) ref 18, (b) ref 19, (c) ref 20, (d) ref 21, and (e) ref 22.

**Table S5.** GC/MSD conditions for the analyses of PAHs and alkylated PAHs.

| GC/MSD system        | Agilent 7890A GC and 5975C MSD                                                |
|----------------------|-------------------------------------------------------------------------------|
| Column               | DB-5MS (30 m long, 0.25 mm i.d., 0.25 µm film thickness)                      |
| Gas flow             | 1 mL/min He                                                                   |
| Injection mode       | Splitless                                                                     |
| Injection volume     | 2 µL                                                                          |
| MS temperature       | 180 °C                                                                        |
| Detector temperature | 230 °C                                                                        |
| Oven temperature     | 60 °C hold for 2 min<br>Increase 6 °C/min to 300 °C<br>300 °C hold for 13 min |

**Table S6.** Mean concentrations of PAHs (ng/g, wm) in soft tissue of clams, *Mactra veneriformis*, under OSAs feeding experiments. Acronyms for PAHs given in SI-Table S4.

| Treatment    |               | OSA <sub>low</sub> |       |       |       |       |       |       |       | OSA <sub>high</sub> |       |       |       |       |       |       |       |
|--------------|---------------|--------------------|-------|-------|-------|-------|-------|-------|-------|---------------------|-------|-------|-------|-------|-------|-------|-------|
| Sampling day |               | 1                  | 2     | 4     | 7     | 14    | 30    | 40    | 50    | 1                   | 2     | 4     | 7     | 14    | 30    | 40    | 50    |
| LMM<br>PAHs  | <b>Nap*</b>   | 341.9              | 97.1  | 365.9 | 79.0  | 120.1 | 114.5 | 389.5 | 375.9 | 336.1               | 87.8  | 255.6 | 69.5  | 94.8  | 120.3 | 506.1 | 376.0 |
|              | <b>C1-Nap</b> | 57.8               | 67.3  | 58.9  | 69.6  | 74.4  | 78.0  | 32.2  | 47.8  | 78.1                | 62.0  | 50.3  | 70.5  | 81.4  | 78.7  | 59.3  | 49.9  |
|              | <b>C2-Nap</b> | 177.4              | 127.0 | 185.9 | 206.4 | 162.1 | 124.6 | 60.7  | 94.2  | 369.5               | 153.7 | 320.8 | 311.8 | 151.8 | 131.9 | 176.0 | 146.8 |
|              | <b>C3-Nap</b> | 129.1              | 77.0  | 147.4 | 196.1 | 177.9 | 96.1  | 78.1  | 90.0  | 252.6               | 125.7 | 228.6 | 213.0 | 138.0 | 125.6 | 237.4 | 215.5 |
|              | <b>C4-Nap</b> | 106.2              | 108.7 | 138.3 | 290.8 | 330.2 | 264.1 | 106.9 | 128.9 | 68.1                | 203.2 | 174.6 | 471.5 | 214.8 | 370.7 | 273.5 | 307.6 |
|              | Flu           | 3.0                | 5.7   | 3.4   | 6.6   | 7.1   | 6.1   | 2.8   | 2.9   | 4.6                 | 5.5   | 4.7   | 6.9   | 5.2   | 7.1   | 4.8   | 3.6   |
|              | <b>C1-Flu</b> | 30.1               | 21.5  | 35.1  | 48.7  | 44.0  | 25.1  | 16.4  | 31.5  | 50.5                | 30.1  | 56.0  | 60.9  | 31.5  | 32.4  | 29.6  | 54.0  |
|              | <b>C2-Flu</b> | 16.1               | 27.5  | 23.5  | 79.2  | 93.8  | 72.8  | 23.9  | 26.7  | 25.8                | 43.3  | 36.1  | 96.7  | 77.7  | 118.3 | 48.6  | 56.4  |
|              | <b>C3-Flu</b> | 24.4               | 45.2  | 39.8  | 176.0 | 262.7 | 238.4 | 42.6  | 74.4  | 36.1                | 79.3  | 50.2  | 189.8 | 209.3 | 433.8 | 152.7 | 164.4 |
|              | Dbt           | 0.4                | 3.6   | 1.3   | 16.1  | 5.8   | 3.4   | 0.7   | 0.5   | 0.6                 | 8.1   | 2.2   | 20.6  | 6.8   | 6.8   | 1.1   | 1.0   |
|              | <b>C1-Dbt</b> | 2.8                | 16.2  | 8.1   | 98.0  | 52.0  | 63.9  | 5.5   | 5.2   | 4.2                 | 32.8  | 13.3  | 85.9  | 64.4  | 122.6 | 5.8   | 12.3  |
|              | <b>C2-Dbt</b> | 0.9                | 21.1  | 3.1   | 217.8 | 207.1 | 360.0 | 4.1   | 2.9   | 1.4                 | 54.9  | 4.1   | 235.8 | 264.4 | 738.1 | 3.5   | 8.0   |
|              | <b>C3-Dbt</b> | 3.7                | 11.3  | 10.2  | 126.1 | 190.2 | 317.7 | 19.4  | 18.8  | 5.3                 | 27.8  | 12.8  | 128.4 | 223.9 | 629.2 | 21.1  | 50.0  |
|              | Phe           | 7.0                | 13.3  | 9.5   | 21.8  | 19.6  | 18.0  | 6.2   | 7.5   | 11.2                | 15.9  | 13.9  | 20.9  | 14.6  | 21.6  | 11.4  | 12.4  |
|              | <b>C1-Phe</b> | 23.8               | 15.2  | 37.1  | 37.9  | 46.0  | 21.0  | 34.7  | 40.7  | 40.5                | 25.0  | 56.4  | 42.4  | 35.6  | 53.7  | 77.1  | 90.8  |
|              | <b>C2-Phe</b> | 68.0               | 29.6  | 118.0 | 114.4 | 205.1 | 158.5 | 169.1 | 230.3 | 109.0               | 61.2  | 147.5 | 143.4 | 159.9 | 287.0 | 315.3 | 495.9 |
|              | <b>C3-Phe</b> | 13.4               | 33.6  | 22.8  | 117.0 | 197.7 | 198.2 | 91.7  | 71.6  | 17.2                | 43.1  | 28.7  | 134.2 | 179.8 | 367.9 | 154.1 | 125.3 |
|              | <b>C4-Phe</b> | 5.9                | 8.6   | 8.1   | 17.0  | 22.5  | 25.1  | 28.0  | 32.0  | 8.0                 | 7.5   | 10.3  | 18.9  | 21.7  | 45.2  | 32.5  | 58.8  |
| HMM<br>PAHs  | Fl            | 2.9                | 4.1   | 3.3   | 3.8   | 4.7   | 4.6   | 1.8   | 3.5   | 3.7                 | 3.3   | 3.1   | 3.1   | 4.3   | 5.3   | 2.9   | 3.0   |
|              | Py            | 3.5                | 3.3   | 4.0   | 4.1   | 5.7   | 5.5   | 4.5   | 7.2   | 4.6                 | 3.3   | 4.1   | 4.3   | 6.6   | 8.7   | 6.8   | 9.4   |
|              | <b>BaA</b>    | 2.8                | 1.2   | 1.4   | 1.6   | 9.3   | 1.9   | 6.7   | 7.5   | 1.7                 | 1.3   | 1.7   | 2.0   | 7.9   | 5.3   | 15.1  | 8.1   |
|              | <b>Chr</b>    | 3.6                | 3.1   | 2.2   | 4.8   | 1.1   | 12.4  | 6.7   | 7.9   | 2.4                 | 3.6   | 2.0   | 6.6   | 8.8   | 23.0  | 1.1   | 14.4  |
|              | <b>C1-Chr</b> | 0.4                | 8.4   | 0.4   | 12.4  | 20.2  | 26.5  | 2.4   | 0.7   | 0.5                 | 7.2   | 0.5   | 16.2  | 22.5  | 57.1  | 5.3   | 0.3   |
|              | <b>C2-Chr</b> | 0.3                | 13.2  | 0.3   | 18.8  | 17.7  | 20.0  | 3.1   | 0.3   | 0.2                 | 13.6  | 1.1   | 17.3  | 23.0  | 42.4  | 6.2   | 0.4   |
|              | <b>C3-Chr</b> | 0.2                | 3.3   | 0.3   | 6.2   | 6.9   | 7.8   | 1.7   | 0.4   | 0.3                 | 4.7   | 0.7   | 6.6   | 8.9   | 14.6  | 2.0   | 0.4   |

\*20 PAHs in bold indicate that accumulated PAHs concentrations higher than 30 ng/g wm for LMM PAHs and 10 ng/g wm for HMM PAHs over the period of 50 days.



**Table S7.** Result of Mann-Whitney U-test for comparison of replicates (n = 2) per treatment in total PAHs. The replications of Control, OSA<sub>low</sub>, and OSA<sub>high</sub> were tested.

|                | Experimental treatment |                    |                     |
|----------------|------------------------|--------------------|---------------------|
|                | Control                | OSA <sub>low</sub> | OSA <sub>high</sub> |
| Mann-Whitney U | 18.0                   | 29.0               | 28.0                |
| p value        | .491                   | .798               | 1.00                |

**Table S8.** Spearman rank correlation results for concentrations of 20 PAHs in soft tissue of clams, *Macra veneriformis*. Values in bold indicate correlation significance at the  $p < 0.01$  level (matched with ++). Acronyms for PAHs given in SI-Table S4.

| Compounds |        | Lower molecular mass (LMM) PAHs |              |        |             |        |             |             |             |              |              |             |             |        |             | Higher molecular mass (HMM) PAHs |             |       |              |              |             |
|-----------|--------|---------------------------------|--------------|--------|-------------|--------|-------------|-------------|-------------|--------------|--------------|-------------|-------------|--------|-------------|----------------------------------|-------------|-------|--------------|--------------|-------------|
|           |        | Nap                             | C1-Nap       | C2-Nap | C3-Nap      | C4-Nap | C1-Flu      | C2-Flu      | C3-Flu      | C1-Dbt       | C2-Dbt       | C3-Dbt      | C1-Phe      | C2-Phe | C3-Phe      | C4-Phe                           | BaA         | Chr   | C1-Chr       | C2-Chr       | C3-Chr      |
| LMM PAHs  | Nap    |                                 | <b>-.624</b> | -.229  | .085        | -.362  | -.221       | -.556       | -.435       | <b>-.753</b> | <b>-.659</b> | -.432       | .335        | .521   | -.206       | .379                             | .476        | -.112 | <b>-.624</b> | <b>-.624</b> | -.618       |
|           | C1-Nap | ++                              |              | .194   | .115        | .365   | .144        | .609        | .562        | <b>.624</b>  | <b>.624</b>  | .544        | -.106       | -.129  | .476        | -.076                            | -.082       | .115  | <b>.747</b>  | <b>.641</b>  | <b>.688</b> |
|           | C2-Nap |                                 |              |        | <b>.815</b> | .041   | <b>.703</b> | .003        | -.224       | -.018        | -.259        | -.306       | .297        | -.371  | -.394       | -.544                            | -.268       | -.571 | -.268        | -.244        | -.256       |
|           | C3-Nap |                                 |              | ++     |             | .247   | <b>.724</b> | .159        | -.012       | -.071        | -.224        | -.097       | <b>.668</b> | .138   | -.091       | -.056                            | .186        | -.421 | -.309        | -.229        | -.200       |
|           | C4-Nap |                                 |              |        |             |        | .403        | <b>.918</b> | <b>.879</b> | <b>.776</b>  | <b>.726</b>  | <b>.824</b> | .535        | .491   | <b>.794</b> | .535                             | .356        | .250  | .532         | <b>.691</b>  | <b>.688</b> |
|           | C1-Flu |                                 |              | ++     | ++          |        |             | .341        | .159        | .224         | .024         | .068        | <b>.632</b> | .085   | -.053       | -.047                            | .018        | -.088 | -.191        | -.097        | -.068       |
|           | C2-Flu | +                               | +            |        |             | ++     |             |             | <b>.947</b> | <b>.882</b>  | <b>.859</b>  | <b>.903</b> | .388        | .374   | <b>.844</b> | .471                             | .279        | .318  | <b>.759</b>  | <b>.835</b>  | <b>.868</b> |
|           | C3-Flu |                                 | +            |        |             | ++     |             | ++          |             | <b>.832</b>  | <b>.874</b>  | <b>.971</b> | .312        | .503   | <b>.941</b> | .585                             | .391        | .400  | <b>.791</b>  | <b>.865</b>  | <b>.891</b> |
|           | C1-Dbt | ++                              | ++           |        |             | ++     |             | ++          | ++          |              | <b>.944</b>  | <b>.832</b> | .062        | .062   | <b>.691</b> | .215                             | -.100       | .344  | <b>.788</b>  | <b>.921</b>  | <b>.888</b> |
|           | C2-Dbt | ++                              | ++           |        |             | ++     |             | ++          | ++          | ++           |              | <b>.918</b> | -.038       | .168   | <b>.809</b> | .347                             | .026        | .497  | <b>.859</b>  | <b>.959</b>  | <b>.953</b> |
|           | C3-Dbt |                                 | +            |        |             | ++     |             | ++          | ++          | ++           | ++           |             | .203        | .482   | <b>.947</b> | .585                             | .362        | .526  | <b>.806</b>  | <b>.894</b>  | <b>.912</b> |
|           | C1-Phe |                                 |              |        | ++          | +      | ++          |             |             |              |              |             |             |        | <b>.703</b> | .288                             | .562        | -.085 | -.168        | -.059        | -.006       |
|           | C2-Phe | +                               |              |        |             |        |             |             | +           |              |              |             | ++          |        | <b>.647</b> | <b>.932</b>                      | <b>.859</b> | .321  | .088         | .168         | .212        |
|           | C3-Phe |                                 |              |        |             | ++     |             | ++          | ++          | ++           | ++           | ++          |             | ++     |             | <b>.741</b>                      | .544        | .438  | <b>.774</b>  | .821         | <b>.853</b> |
|           | C4-Phe |                                 |              | +      |             | +      |             |             | +           |              |              | +           | +           | ++     | ++          |                                  | <b>.726</b> | .488  | .253         | .321         | .362        |
| HMM PAHs  | BaA    |                                 |              |        |             |        |             |             |             |              |              |             | +           | ++     | +           | ++                               |             | .144  | .079         | .082         | .147        |
|           | Chr    |                                 |              | +      |             |        |             |             |             |              | +            |             |             |        |             |                                  |             |       | .300         | .356         | .356        |
|           | C1-Chr | ++                              | ++           |        |             | +      |             | ++          | ++          | ++           | ++           | ++          |             |        | ++          |                                  |             |       |              | <b>.912</b>  | <b>.947</b> |
|           | C2-Chr | ++                              | ++           |        |             | ++     |             | ++          | ++          | ++           | ++           | ++          |             |        | ++          |                                  |             |       | ++           |              | <b>.976</b> |
|           | C3-Chr | +                               | ++           |        |             | ++     |             | ++          | ++          | ++           | ++           | ++          |             |        | ++          |                                  |             |       | ++           | ++           |             |

++ Significantly correlated at the  $p < 0.01$  level (2-tailed).

+ Significantly correlated at the  $p < 0.05$  level (2-tailed).

**Table S9.** Result of Kolmogorov-Smirnov normality test for concentrations of PAHs in soft tissue of clams, *Macra veneriformis*, over the period of 50 days in OSAs feeding treatments (OSA<sub>low</sub> and OSA<sub>high</sub>). The concentrations of 20 PAHs (refer to SI-Table S6) were standardized by total, and root transformed before these test.

| Kolmogorov-Smirnov normality test |                   |         |
|-----------------------------------|-------------------|---------|
| Statistic                         | degree of freedom | p value |
| .048                              | 320               | .072    |

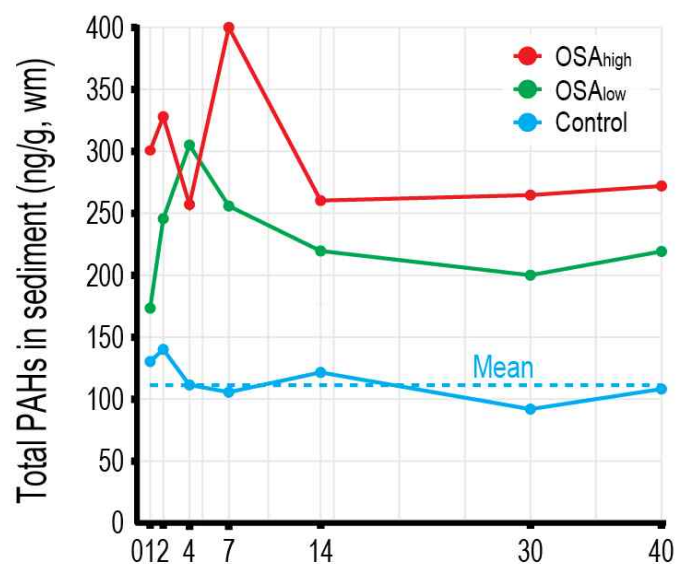

**Figure S1.** Total PAHs concentration in sediments. Blue line denotes Control treatment, green line denotes the OSA<sub>low</sub> treatment, and red line denotes the OSA<sub>high</sub> treatment, the PAHs concentrations are found to be fairly consistent after the 14 days and maintained at certain levels for the last period of experiments cross the treatments.

(A) Relative composition of PAHs in OSAs

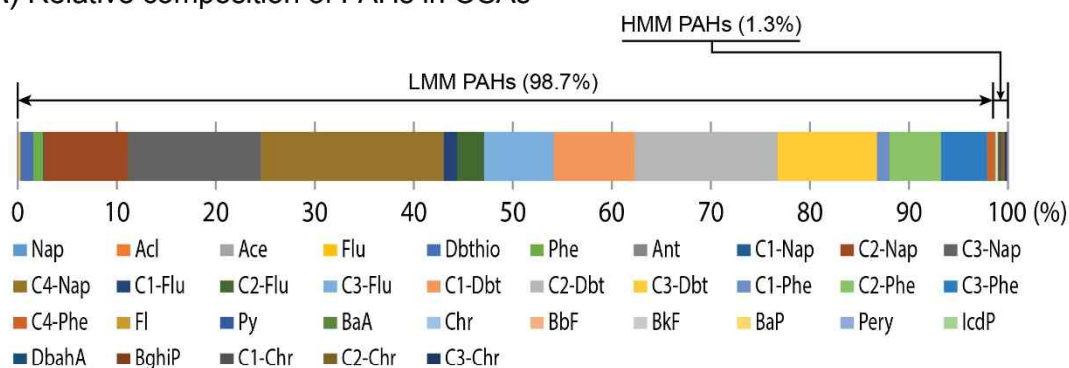

(B) PAHs concentrations in OSAs

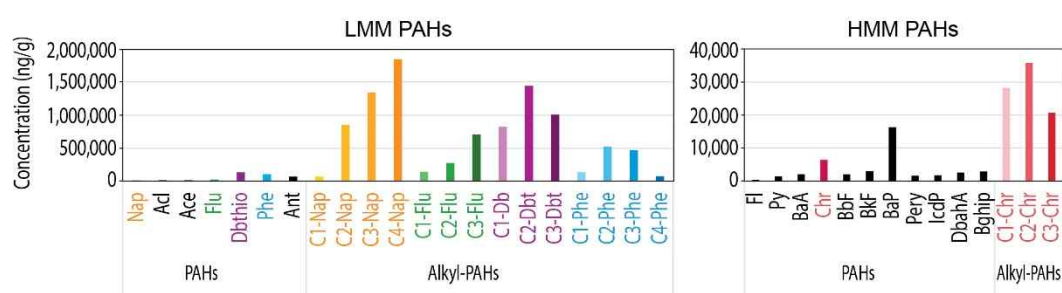

**Figure S2.** PAHs and alkylated PAHs in OSAs. (A) Relative composition of PAHs compounds in OSAs and (B) Concentrations of PAHs and alkylated PAHs in OSAs. Acronyms for the target PAHs given in SI-Table S4.

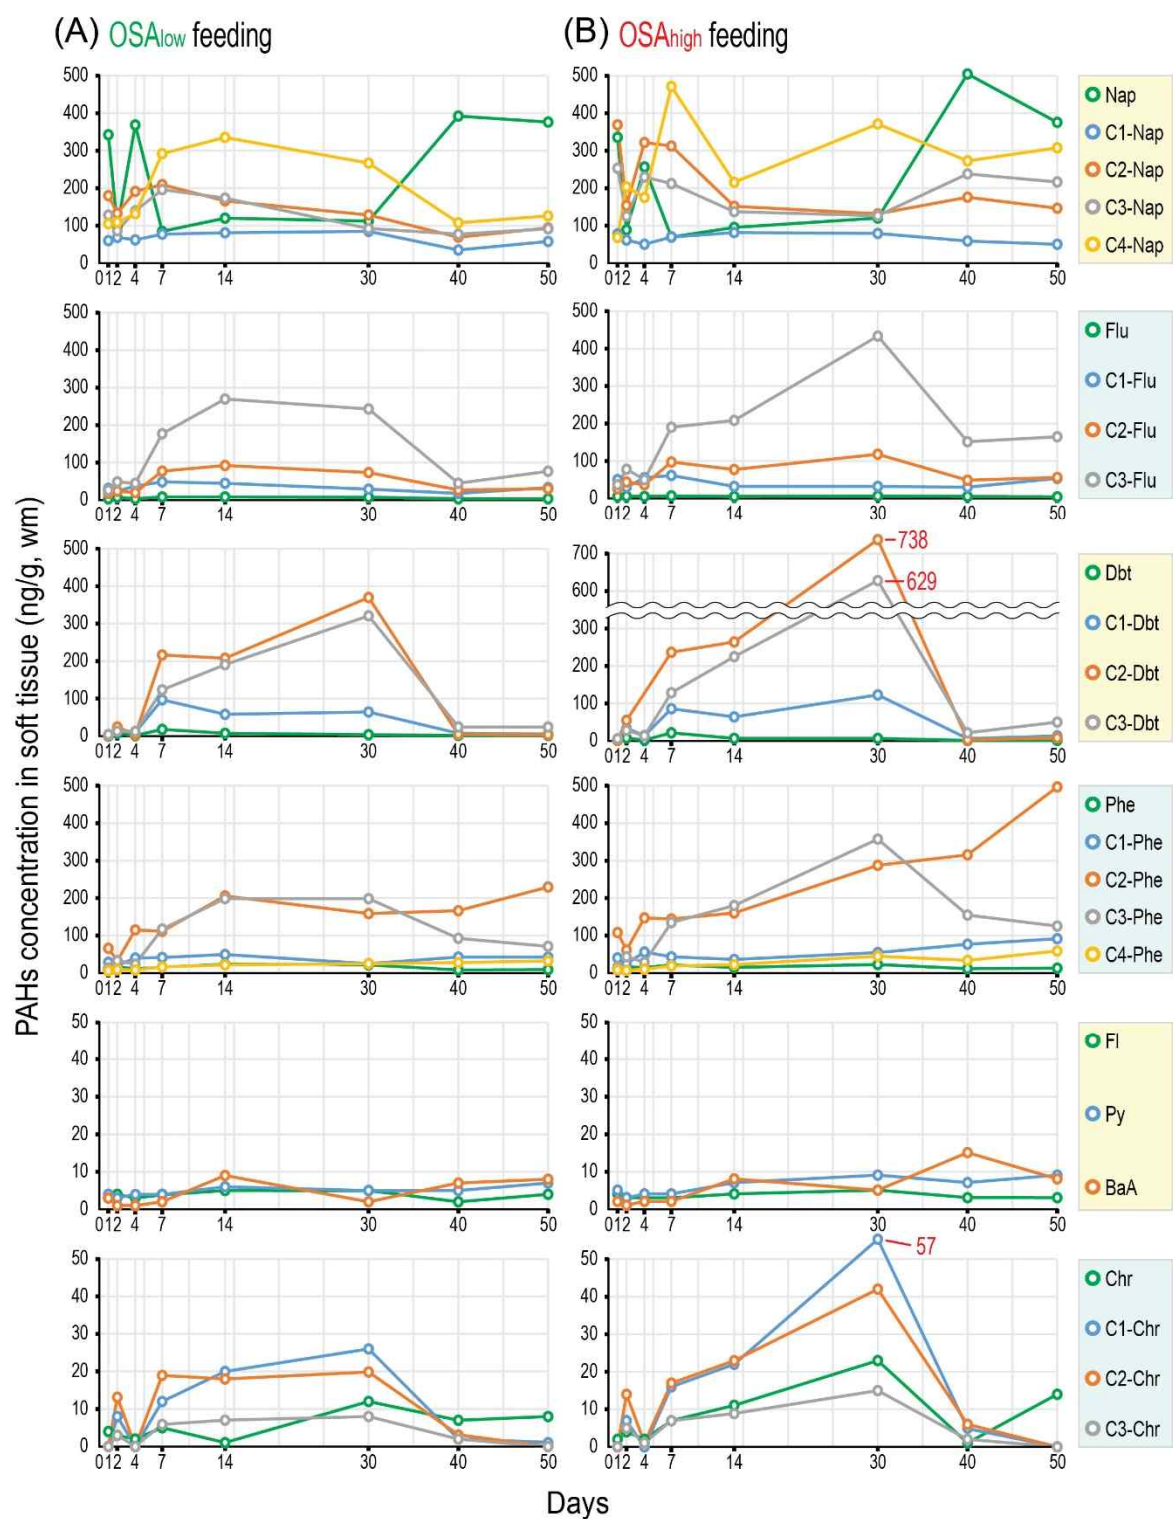

**Figure S3.** Concentrations of 25 PAHs in soft tissue of clams, *Mactra veneriformis*, under (A)  $OSA_{low}$  feeding treatment and (B)  $OSA_{high}$  feeding treatment. Acronyms for PAHs given in SI-Table S4.

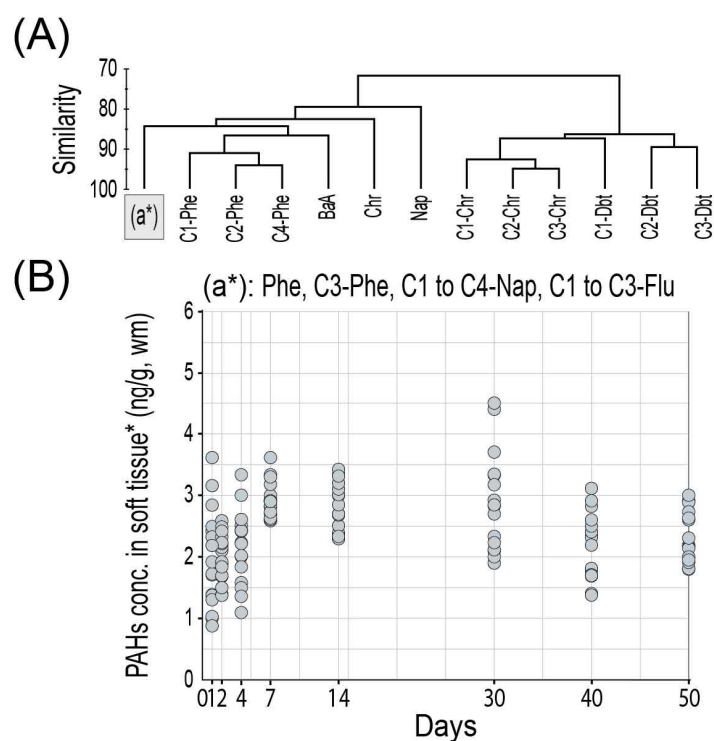

**Figure S4.** PAHs compounds in soft tissue of clams, *Macra veneriformis*, by the bioaccumulation of OSAs feeding experiments; (A) Dendrogram representing hierarchical clustering based on Bray-Curtis similarities (BCS) by group means, (B) Group (a\*) indicated group of PAHs in BCS <85% including Phe, C3-Phe, C1 to C4-Nap, and C1 to C3-Flu (\*Concentrations of PAHs in soft tissue were standardized by total, and square root transformed for normality). Acronyms for PAHs given in SI-Table S4.

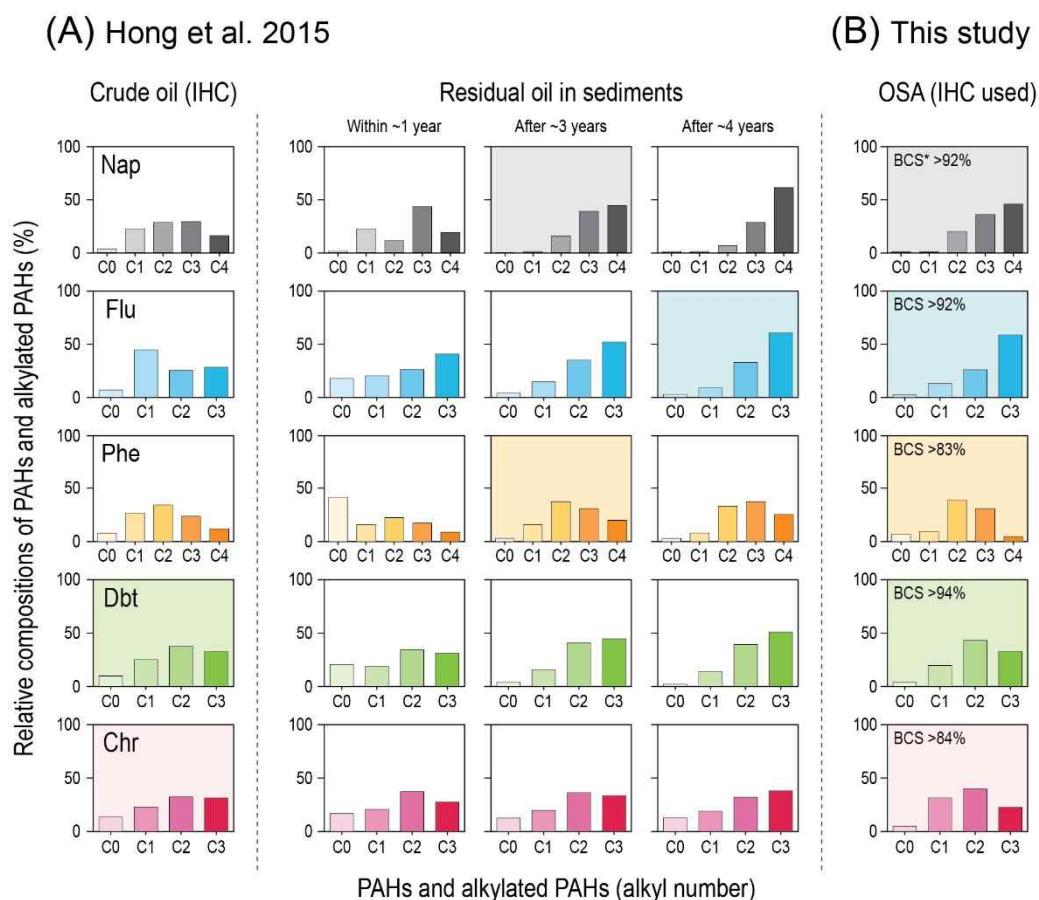

**Figure S5.** Relative compositions of PAHs and alkylated PAHs in crude oil (Iranian Heavy Crude, IHC), sediments contaminated by *Hebei Spirit* oil spill, and OSA made of IHC. (A) These results were referenced from a previous study (Hong et al. 2015) and (B) concentration of OSA quantified in this study (\*Comparisons of Bray-Curtis similarities in relative compositions of PAHs and their alkyl derivatives showed that the most resembled period in weathering of IHC compared to OSA). Acronyms for PAHs given in SI-Table S4.



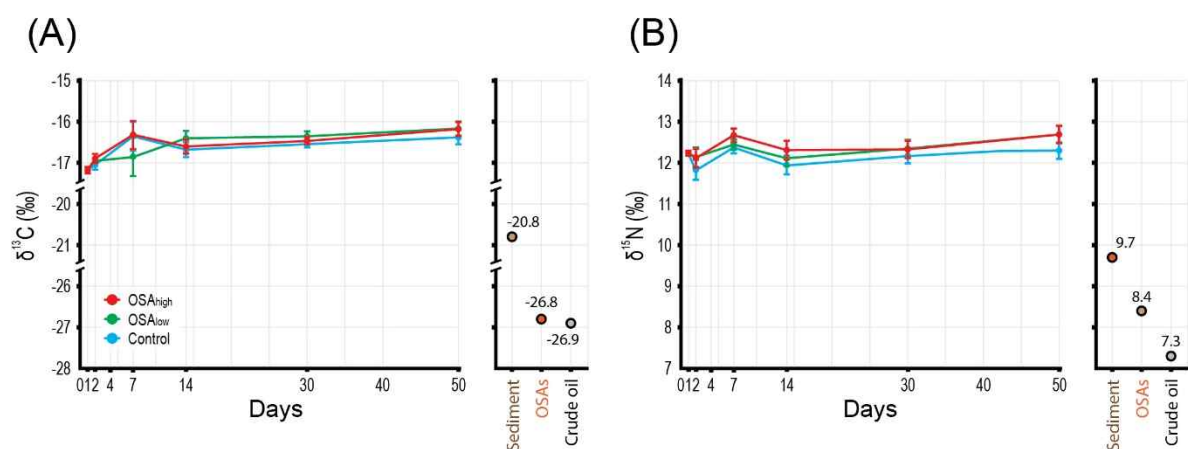

**Figure S6.** (A) Stable isotopic ratios of carbon ( $\delta^{13}\text{C}$ ) and (B) nitrogen ( $\delta^{15}\text{N}$ ) in clams, OSAs, sediment, and crude oil. Blue, green, and red lines denote Control, OSA<sub>low</sub>, and OSA<sub>high</sub> treatment, respectively.

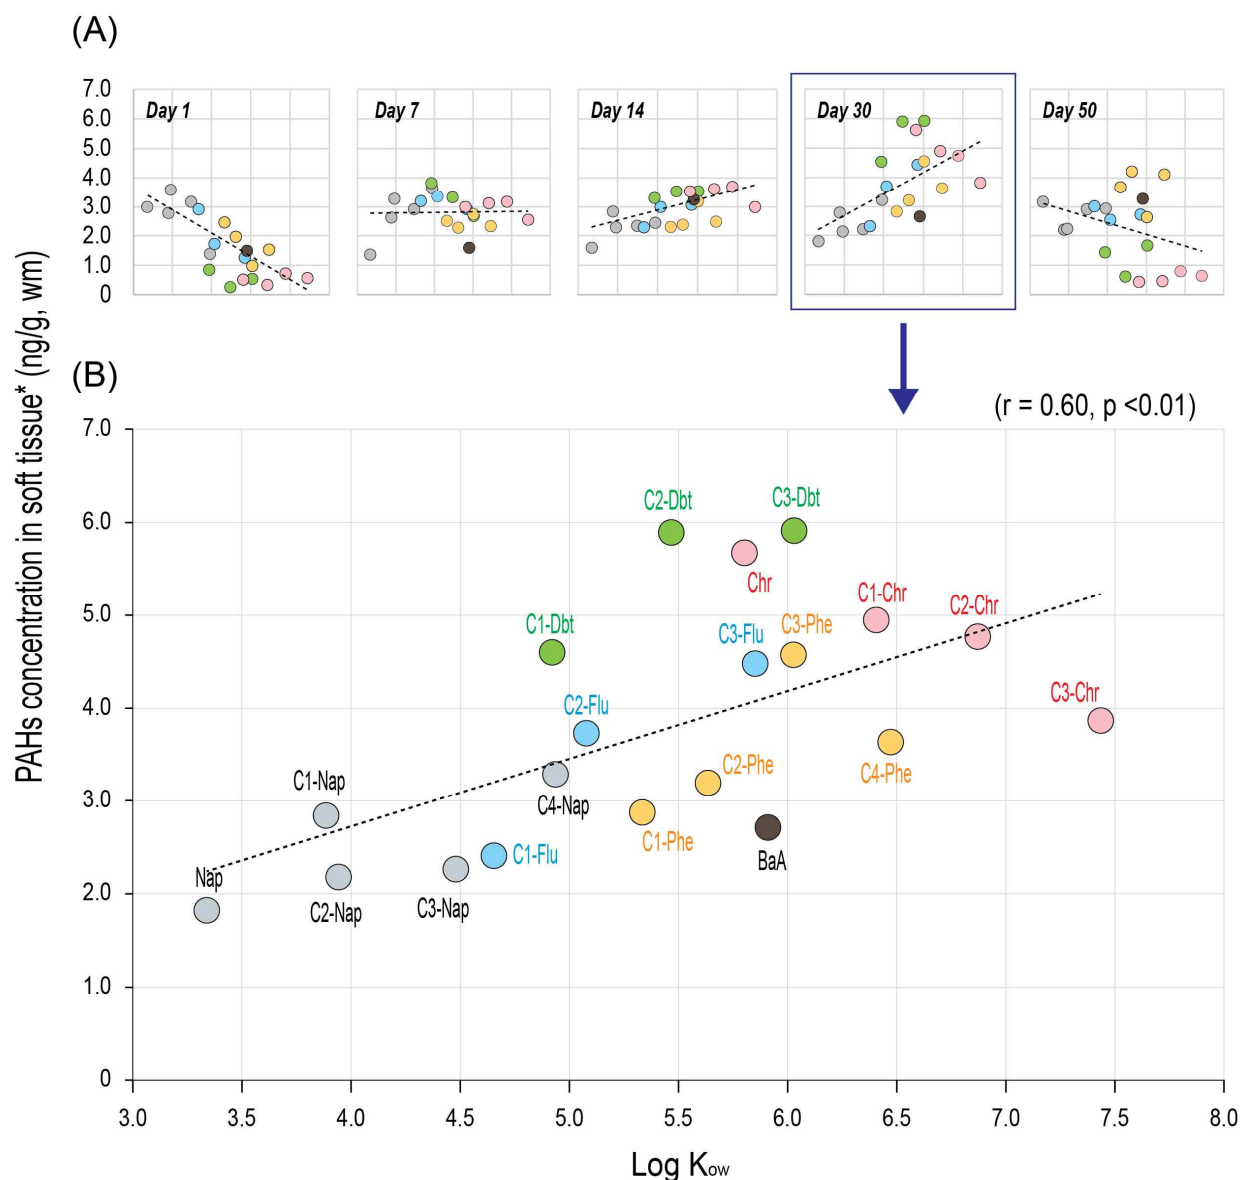

**Figure S7.** Relationship between Log  $K_{ow}$  and concentration of PAHs in soft tissue of clams, *Mactra veneriformis*. (A) Concentration of PAHs compounds in OSA<sub>high</sub> treatments at Days 1, 7, 14, 30, and 50. (B) The result of OSA<sub>high</sub> treatment at Day 30 as peak concentration of PAHs in soft tissue\* (\*The concentrations were standardized by total, and square root transformed for normality). Acronyms for PAHs given in SI-Table S4.

## REFERENCES

- (1) Svensson, E.; Freitas, V.; Schouten, S.; Middelburg, J. J.; van der Veer, H. W.; Damsté J. S. S. Comparison of the stable carbon and nitrogen isotopic values of gill and white muscle tissue of fish. *J. Exp. Mar. Bio. Ecol.* **2014**, 457, 173-179.
- (2) Ferrari, G. M.; Bo, F. G.; Babin, M. Geo-chemical and optical characterizations of suspended matter in European coastal waters. *Estuar. Coast. Shelf Sci.* **2003**, 57 (1), 17-24.
- (3) Khodse, V. B.; Fernandes, L.; Gopalkrishna, V.; Bhosle, N. B.; Fernandes, V.; Matondkar, S. P.; Bhushan, R. Distribution and seasonal variation of concentrations of particulate carbohydrates and uronic acids in the northern Indian Ocean. *Mar. Chem.* **2007**, 103 (3), 327-346.
- (4) West, J. E.; O'Neill, S. M.; Ylitalo, G. M.; Incardona, J. P.; Doty, D. C.; Dutch, M. E. An evaluation of background levels and sources of polycyclic aromatic hydrocarbons in Naturally spawned embryos of Pacific herring (*Clupea pallasii*) from Puget Sound, Washington, USA. *Sci. Total. Environ.* **2014**, 499, 114-124.
- (5) Baumard, P.; Budzinski, H.; Garrigues, P.; Sorbe, J.; Burgeot, T.; Bellocq, J. Concentrations of PAHs (polycyclic aromatic hydrocarbons) in various marine organisms in relation to those in sediments and to trophic level. *Mar. Pollut. Bull.* **1998**, 36 (12), 951-960.
- (6) Oliva, A. L.; La Colla, N. S.; Arias, A. H.; Blasina, G. E.; Cazorla, A. L.; Marcovecchio, J. E. Distribution and human health risk assessment of PAHs in four fish species from a SW Atlantic estuary. *Environ. Sci. Pollut. R.* **2017**, 24 (23), 18979-18990.
- (7) Barhoumi, B.; El Megdiche, Y.; Clérandeau, C.; Ameer, W. B.; Mekni, S.; Bouabdallah, S.; Derouiche, A.; Touil, S.; Cachot, J.; Driss, M. R. Occurrence of polycyclic aromatic hydrocarbons (PAHs) in mussel (*Mytilus galloprovincialis*) and eel (*Anguilla anguilla*) from Bizerte lagoon, Tunisia, and associated human health risk assessment. *Cont. Shelf. Res.* **2016**, 124, 104-116.
- (8) Baussant, T.; Sanni, S.; Jonsson, G.; Skadsheim, A.; Børseth, J. F. Bioaccumulation of polycyclic aromatic compounds: 1. Bioconcentration in two marine species and in semipermeable membrane devices during chronic exposure to dispersed crude oil. *Environ. Toxicol. Chem.* **2001**, 20 (6), 1175-1184.
- (9) Bandowe, B. A. M.; Bigalke, M.; Boamah, L.; Nyarko, E.; Saalia, F. K.; Wilcke, W. Polycyclic aromatic compounds (PAHs and oxygenated PAHs) and trace metals in fish species from Ghana (West Africa): bioaccumulation and health risk assessment. *Environ. Int.* **2014**, 65, 135-146.
- (10) Liang, Y.; Tse, M.; Young, L.; Wong, M. Distribution patterns of polycyclic aromatic hydrocarbons (PAHs) in the sediments and fish at Mai Po Marshes Nature Reserve, Hong Kong. *Water. Res.* **2007**, 41 (6), 1303-1311.
- (11) van der Oost, R.; Heida, H.; Satumalay, K.; van Schooten, F. J.; Ariese, F.; Vermeulen, N. P. Bioaccumulation, biotransformation and DNA binding of PAHs in feral eel (*Anguilla anguilla*) exposed to polluted sediments: a field survey. *Environ. Toxicol. Chem.* **1994**, 13 (6), 859-870.
- (12) Liu, W. X.; Hu, J.; Chen, J. L.; Fan, Y. S.; Xing, B.; Tao, S. Distribution of persistent toxic substances in benthic bivalves from the inshore areas of the Yellow Sea. *Environ. Toxicol. Chem.* **2008**, 27 (1), 57-66.

- (13) Onozato, M.; Nishigaki, A.; Okoshi, K. Polycyclic aromatic hydrocarbons in sediments and bivalves on the Pacific Coast of Japan: Influence of Tsunami and fire. *PLoS one* **2016**, *11* (5), e0156447.
- (14) Bodin, N.; Burgeot, T.; Stanisiere, J.; Bocquené, G.; Menard, D.; Minier, C.; Boutet, I.; Amat, A.; Cherel, Y.; Budzinski, H. Seasonal variations of a battery of biomarkers and physiological indices for the mussel *Mytilus galloprovincialis* transplanted into the northwest Mediterranean Sea. *Comp. Biochem. Phys. C*. **2004**, *138* (4), 411-427.
- (15) Orbea, A.; Ortiz-Zarragoitia, M.; Solé, M.; Porte, C.; Cajaraville, M. P. Antioxidant enzymes and peroxisome proliferation in relation to contaminant body burdens of PAHs and PCBs in bivalve molluscs, crabs and fish from the Urdaibai and Plentzia estuaries (Bay of Biscay). *Aquat. Toxicol.* **2002**, *58* (1), 75-98.
- (16) Camus, L.; Birkely, S.; Jones, M.; Børseth, J.; Grøsvik, B.; Gulliksen, B.; Lønne, O.; Regoli, F.; Depledge, M. Biomarker responses and PAH uptake in *Mya truncata* following exposure to oil-contaminated sediment in an Arctic fjord (Svalbard). *Sci. Total. Environ.* **2003**, *308* (1), 221-234.
- (17) Sun, J.; Khelifa, A.; Zheng, X.; Wang, Z.; So, L. L.; Wong, S.; Yang, C.; Fieldhouse, B. A laboratory study on the kinetics of the formation of oil-suspended particulate matter aggregates using the NIST-1941b sediment. *Mar. Pollut. Bull.* **2010**, *60* (10), 1701-1707.
- (18) Ma, Y.-G.; Lei, Y. D.; Xiao, H.; Wania, F.; Wang, W.-H. Critical review and recommended values for the physical-chemical property data of 15 polycyclic aromatic hydrocarbons at 25 °C. *J. Chem. Eng. Data* **2009**, *55* (2), 819-825.
- (19) Kang, H.-J.; Lee, S.-Y.; Roh, J.-Y.; Yim, U. H.; Shim, W. J.; Kwon, J.-H. Prediction of ecotoxicity of heavy crude oil: contribution of measured components. *Environ. Sci. Technol.* **2014**, *48* (5), 2962-2970.
- (20) Lee, S.; Shin, W.-H.; Hong, S.; Kang, H.; Jung, D.; Yim, U. H.; Shim, W. J.; Khim, J. S.; Seok, C.; Giesy, J. P. Measured and predicted affinities of binding and relative potencies to activate the AhR of PAHs and their alkylated analogues. *Chemosphere* **2015**, *139*, 23-29.
- (21) Dimitriou-Christidis, P.; Harris, B. C.; McDonald, T. J.; Reese, E.; Autenrieth, R. L. Estimation of selected physicochemical properties for methylated naphthalene compounds. *Chemosphere* **2003**, *52* (5), 869-881.
- (22) ChemSpider. database via ACD/Labs Percepta Platform - PhysChem Module 2017. Available: <http://www.chemspider.com/> [last accessed: 06/21/17].
